# Supplementary figures and images for: Toroidal nuclei of columnar lyotropic chromonic liquid crystals coexisting with an isotropic phase
Source: Royal Society of Chemistry journal article supplement (doi:10.1039/d2sm00712f), 2022-01-01

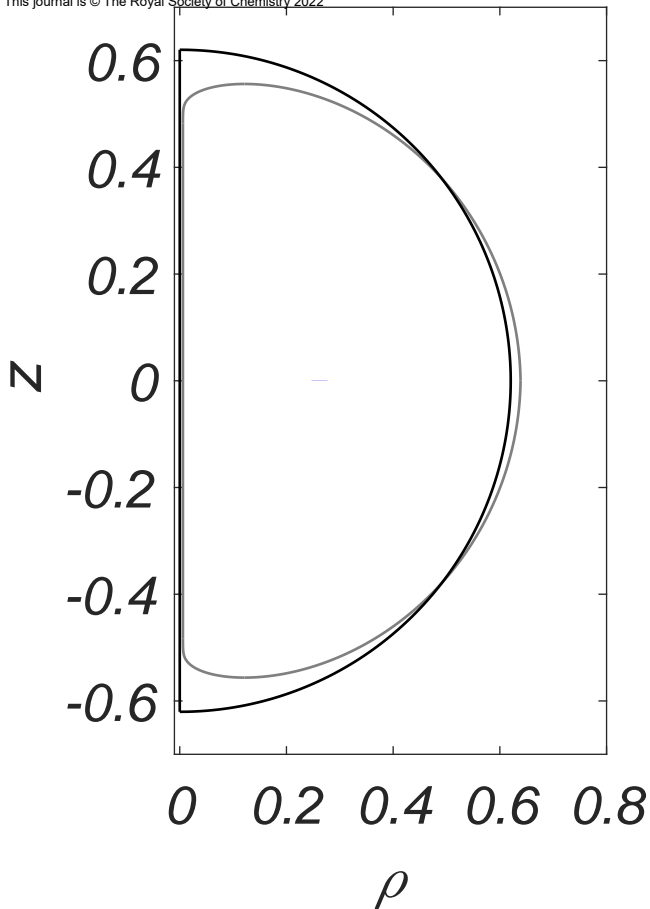

Supplement: d2sm00712f1.pdf [file d2sm00712f1.pdf]

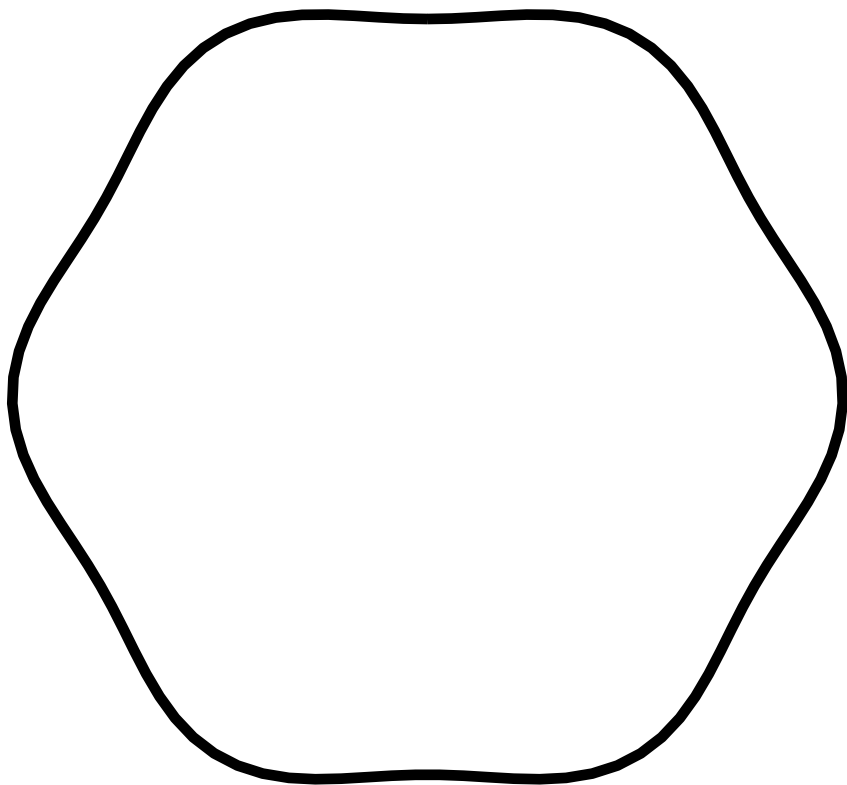

Supplement: d2sm00712f10.pdf [file d2sm00712f10.pdf]

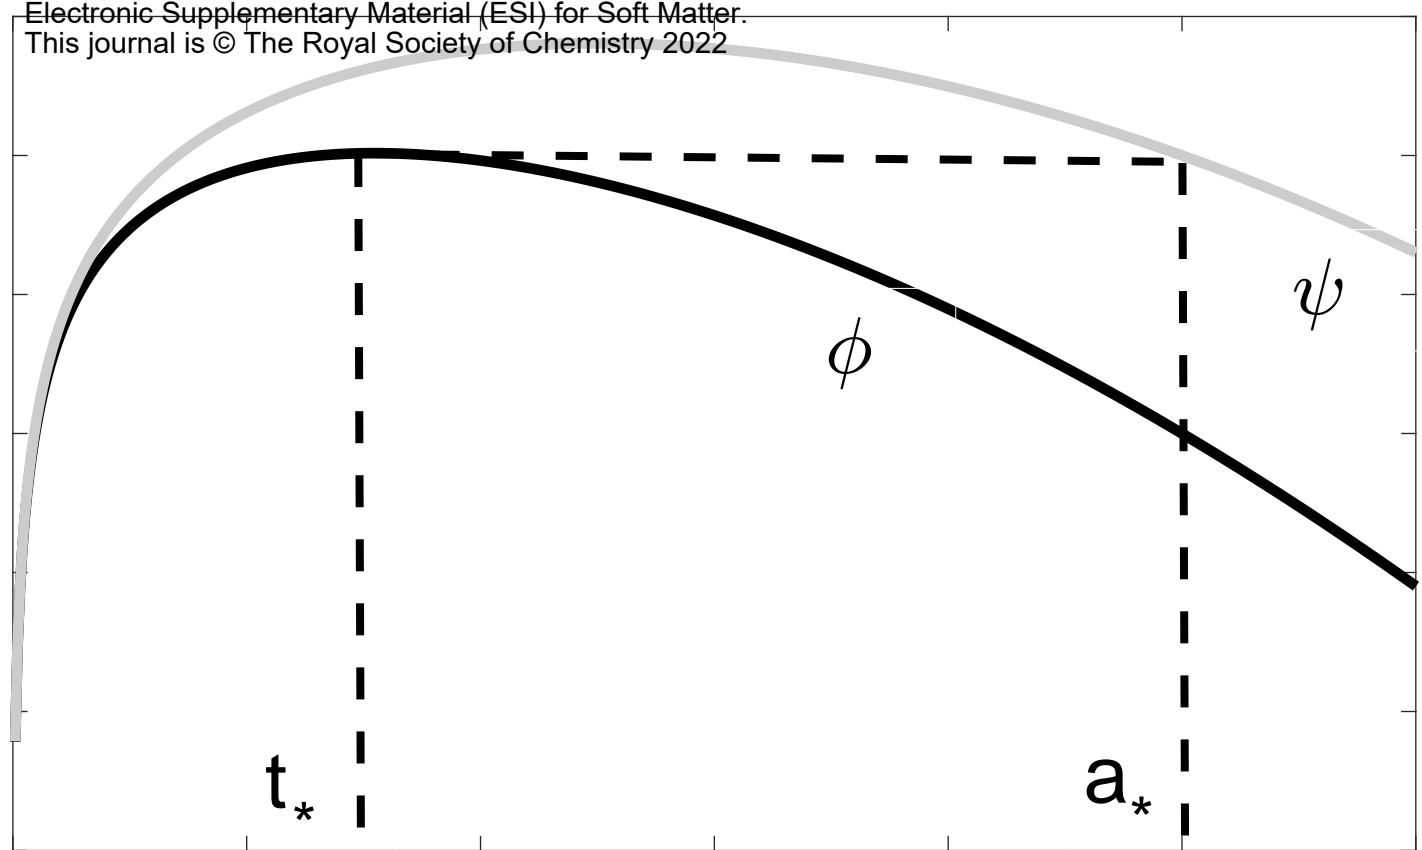

Supplement: d2sm00712f11.pdf [file d2sm00712f11.pdf]

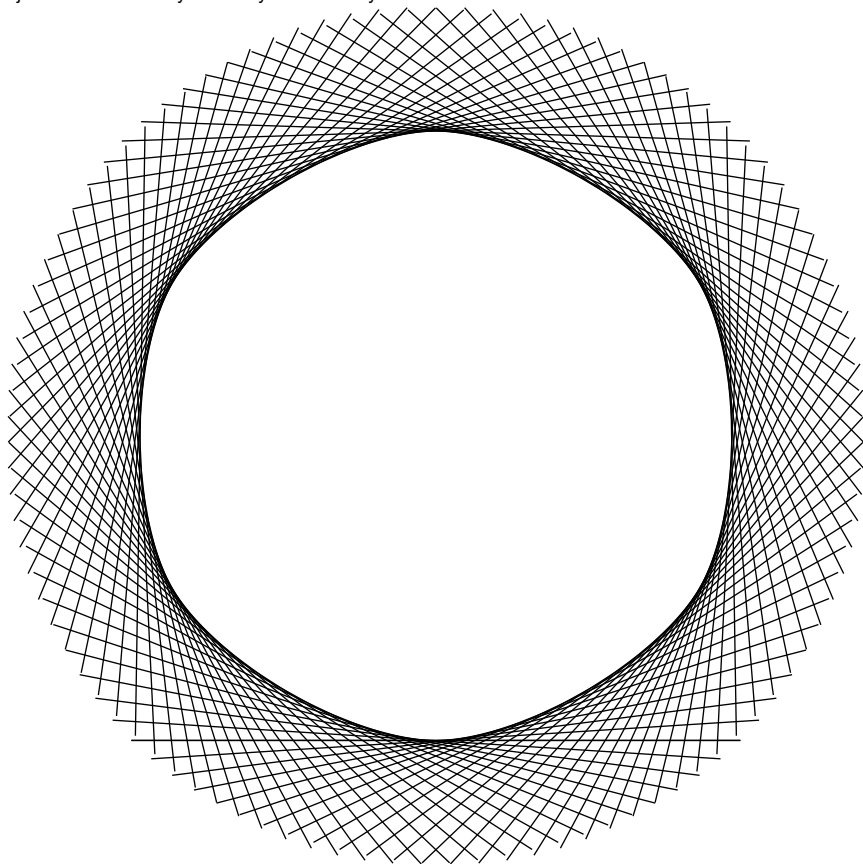

Supplement: d2sm00712f12.pdf [file d2sm00712f12.pdf]

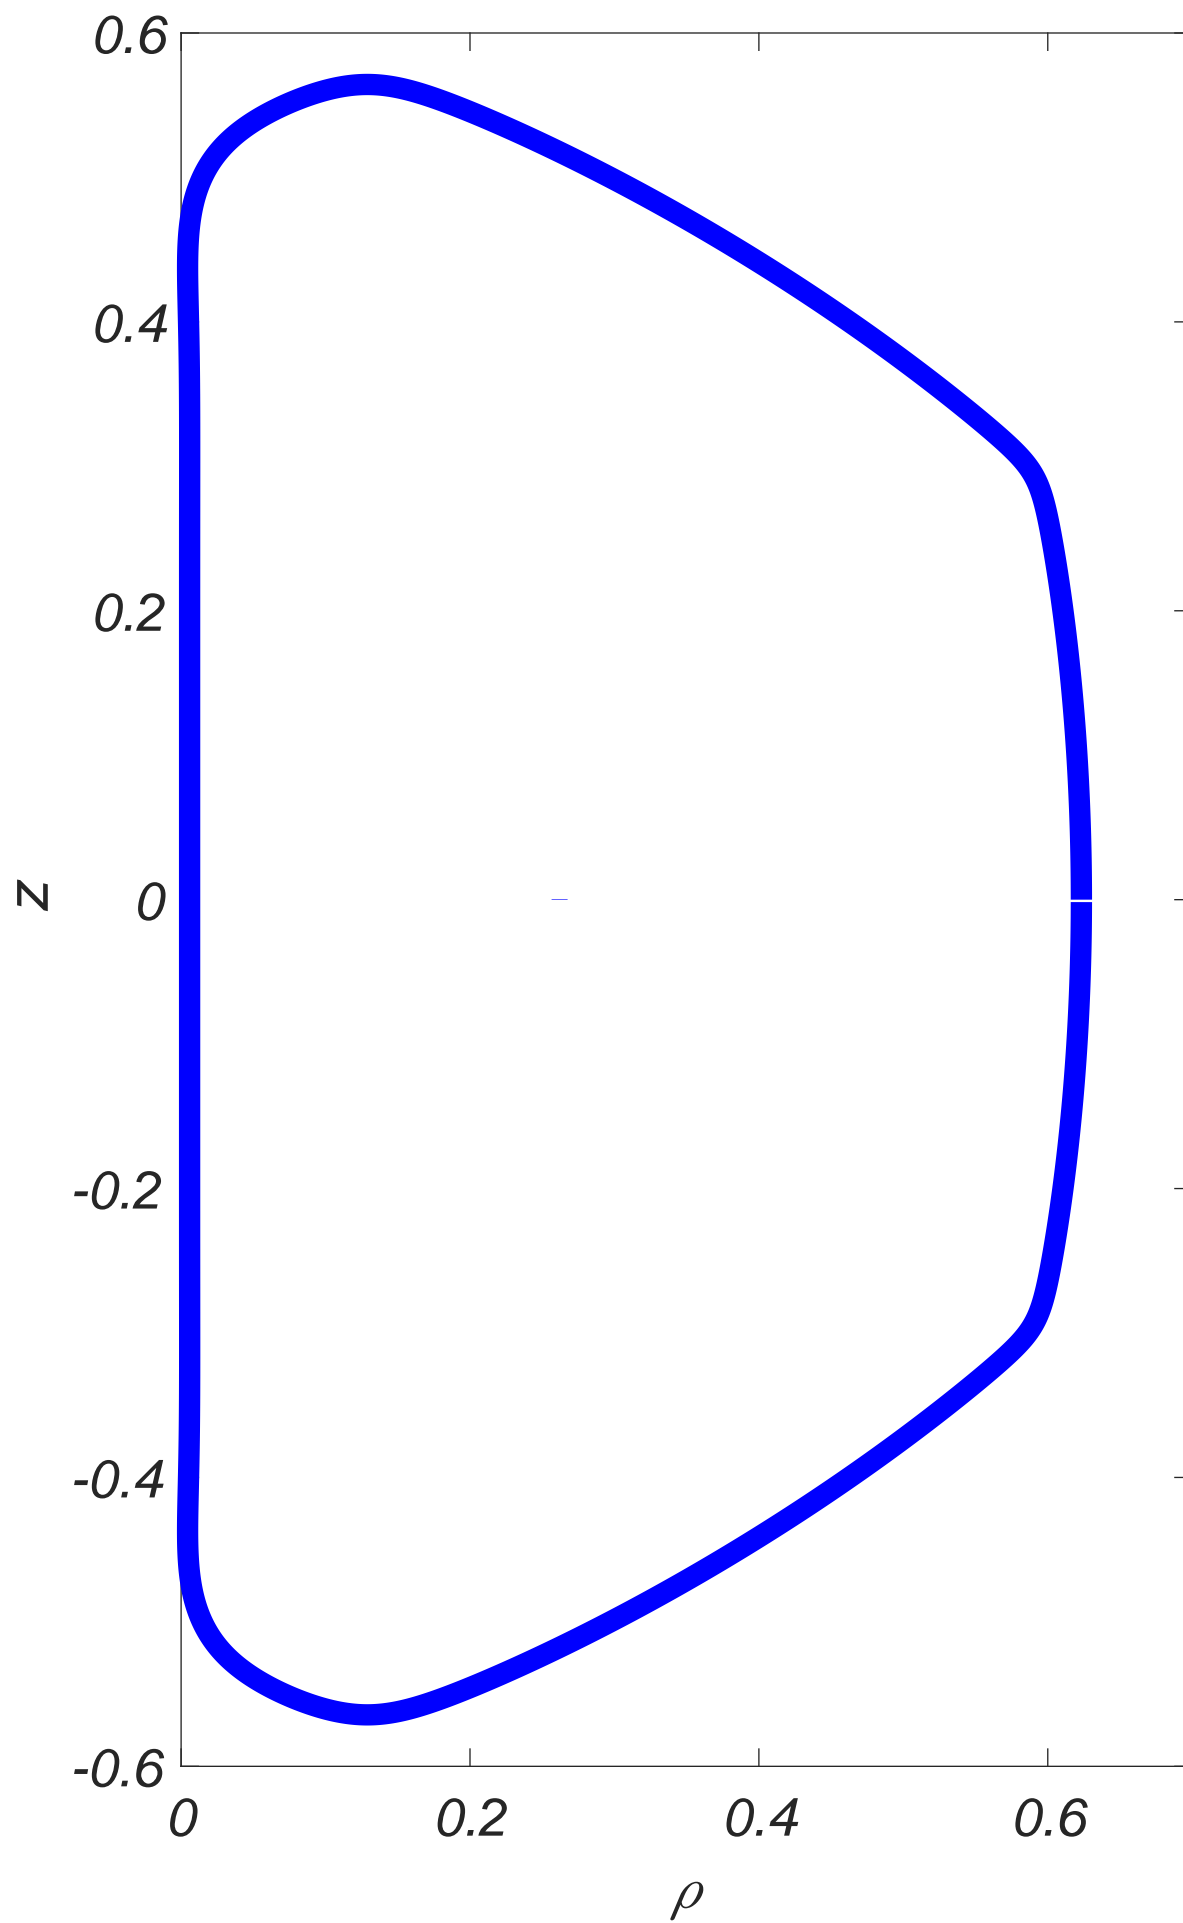

Supplement: d2sm00712f16.pdf [file d2sm00712f16.pdf]

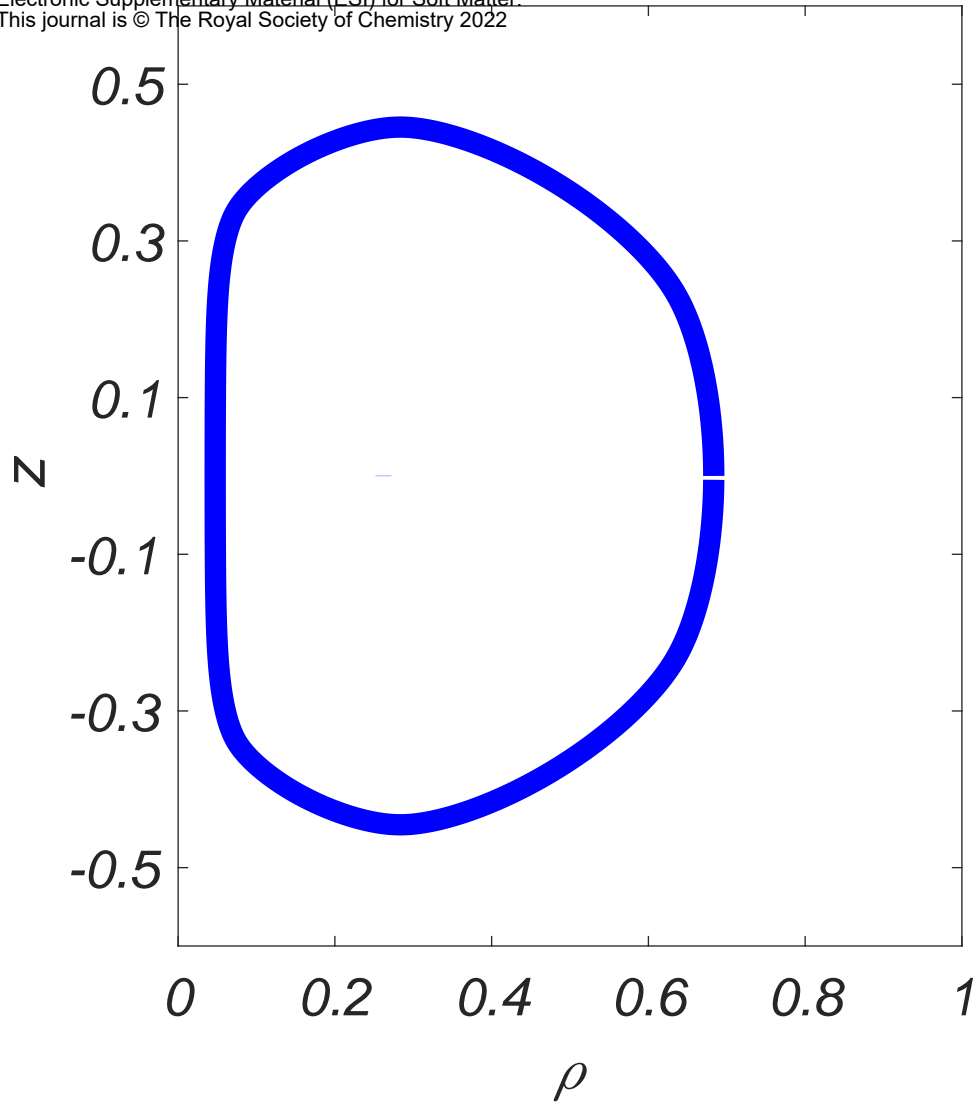

Supplement: d2sm00712f17.pdf [file d2sm00712f17.pdf]

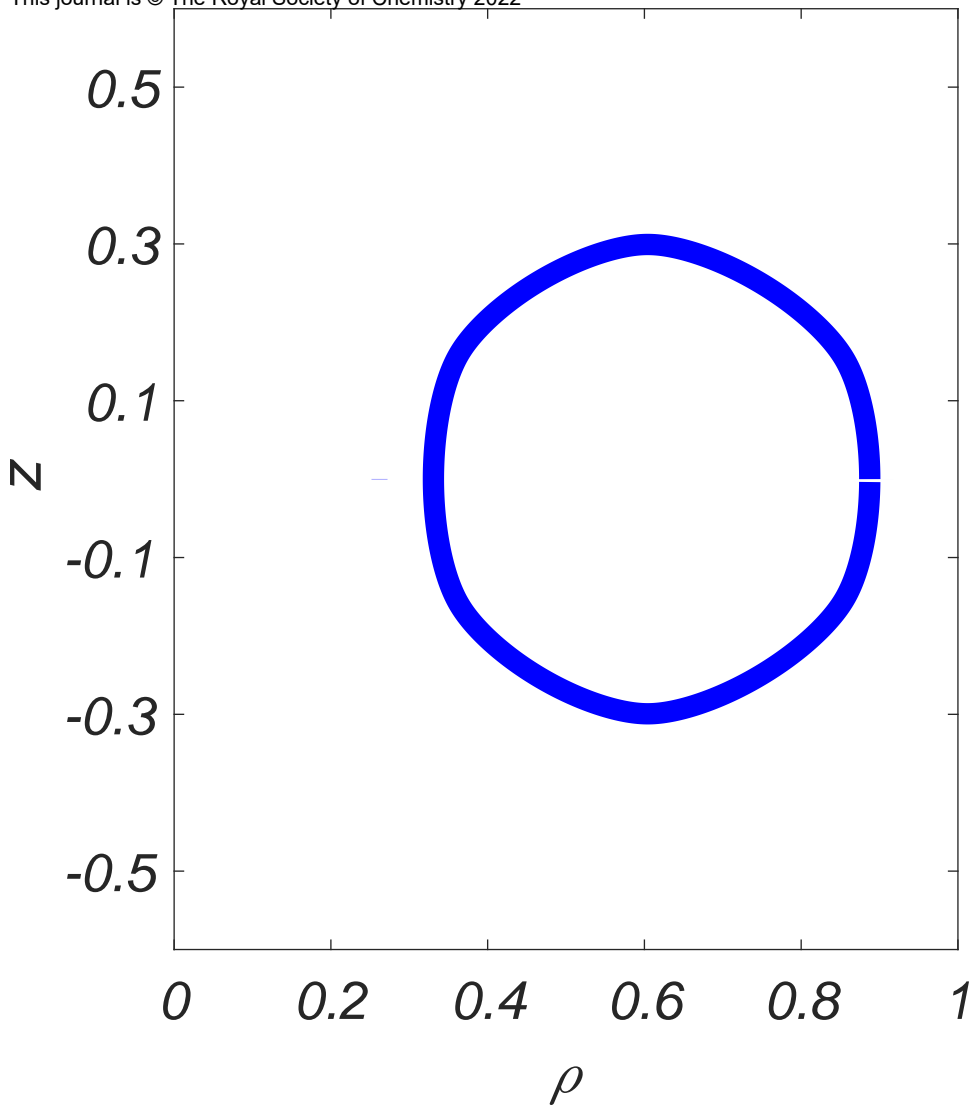

Supplement: d2sm00712f18.pdf [file d2sm00712f18.pdf]

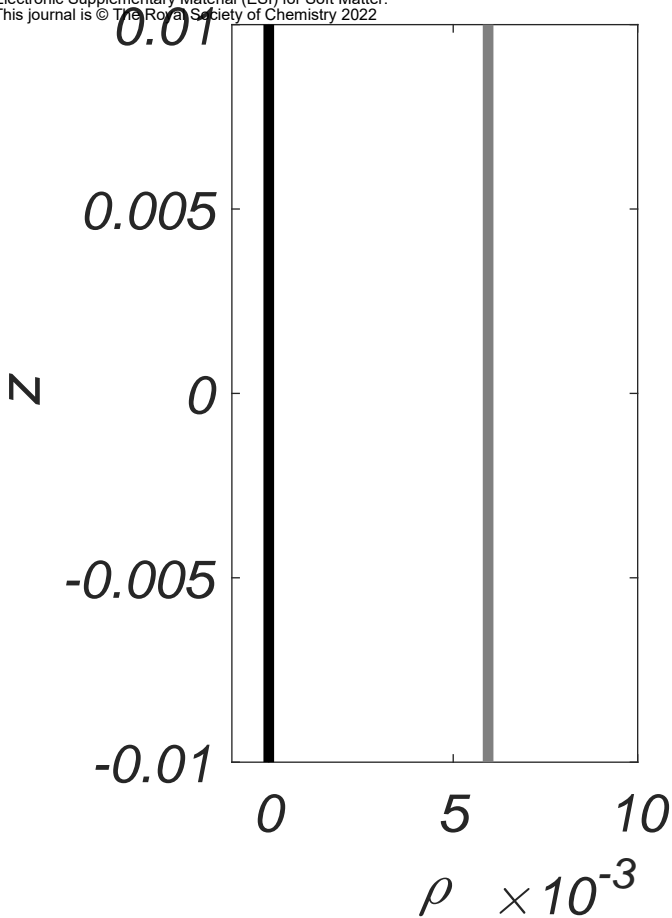

Supplement: d2sm00712f2.pdf [file d2sm00712f2.pdf]

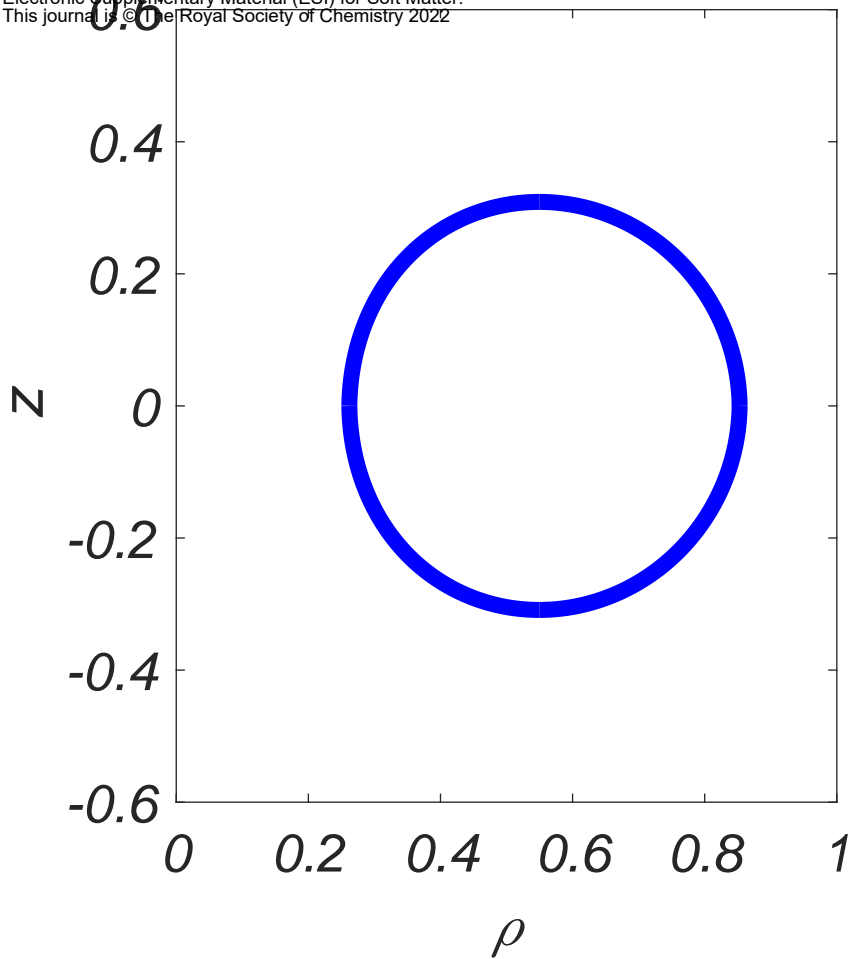

Supplement: d2sm00712f21.pdf [file d2sm00712f21.pdf]

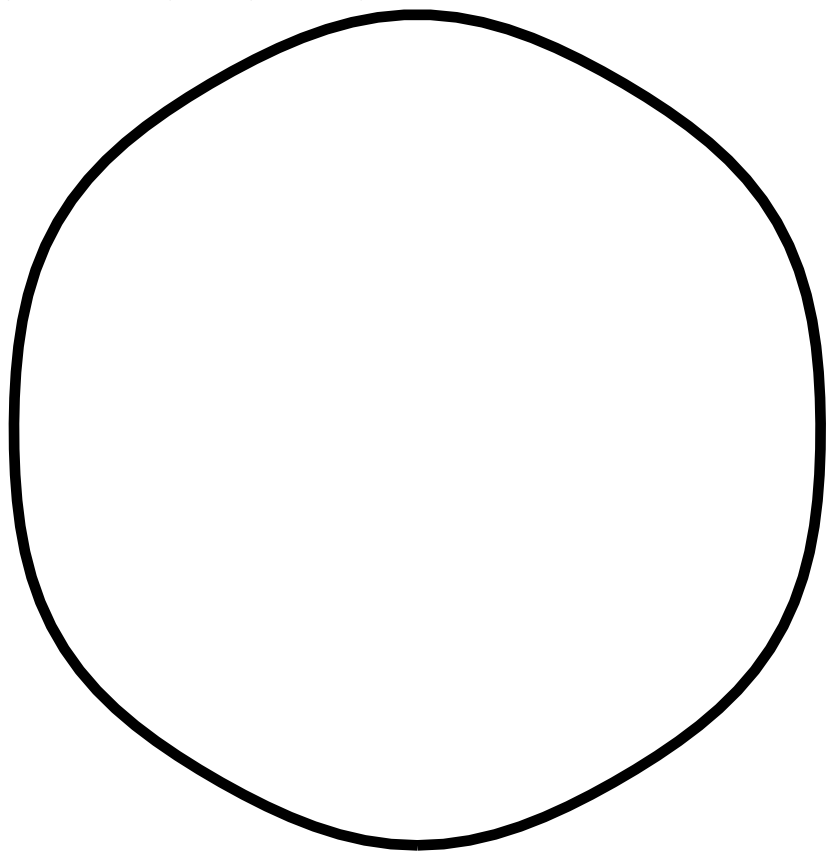

Supplement: d2sm00712f22.pdf [file d2sm00712f22.pdf]

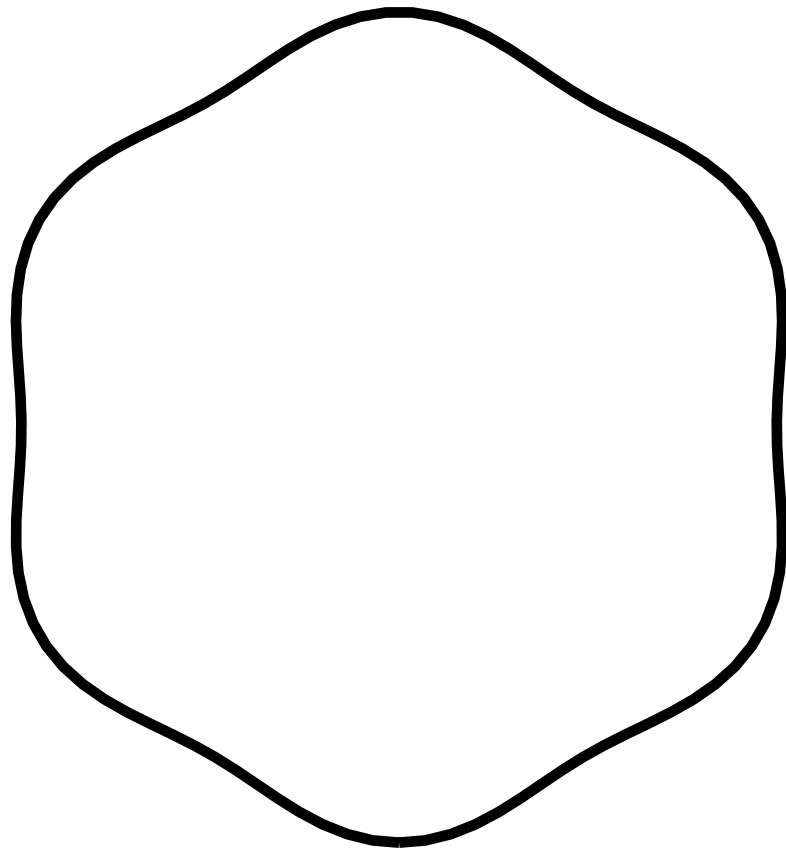

Supplement: d2sm00712f23.pdf [file d2sm00712f23.pdf]

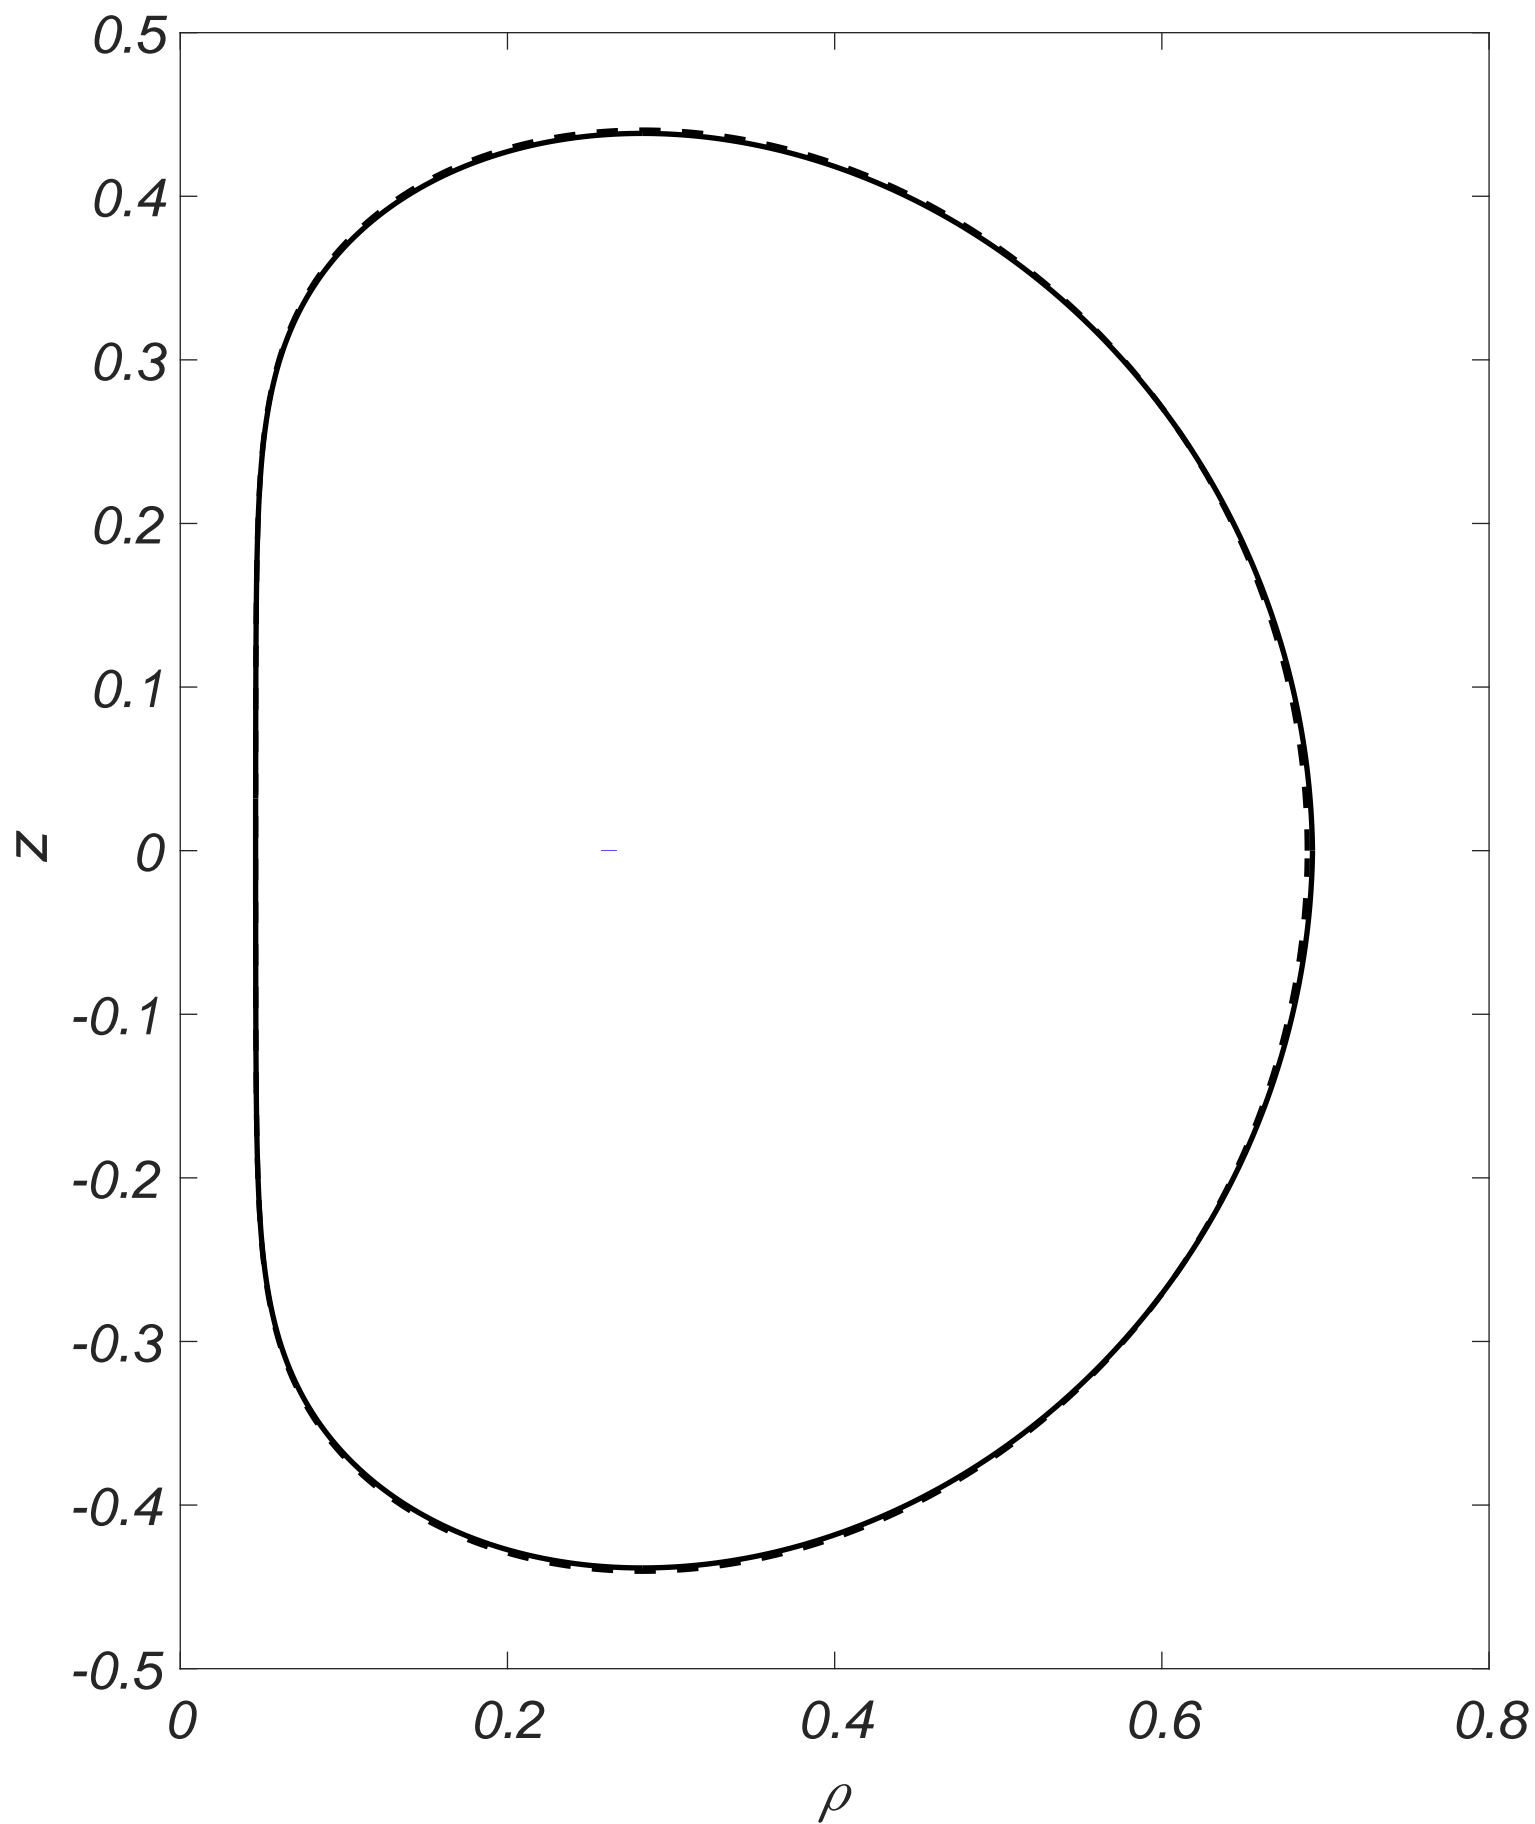

Supplement: d2sm00712f4.pdf [file d2sm00712f4.pdf]

$t=0$  s

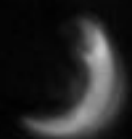

$t=2$  s

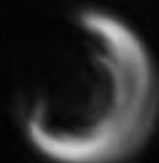

$t=4$  s

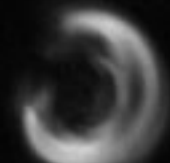

$t=6$  s

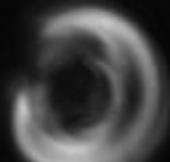

$t=10$  s

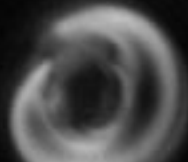

$t=60$  s

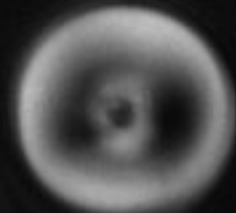

Supplement: d2sm00712f6.pdf [file d2sm00712f6.pdf]

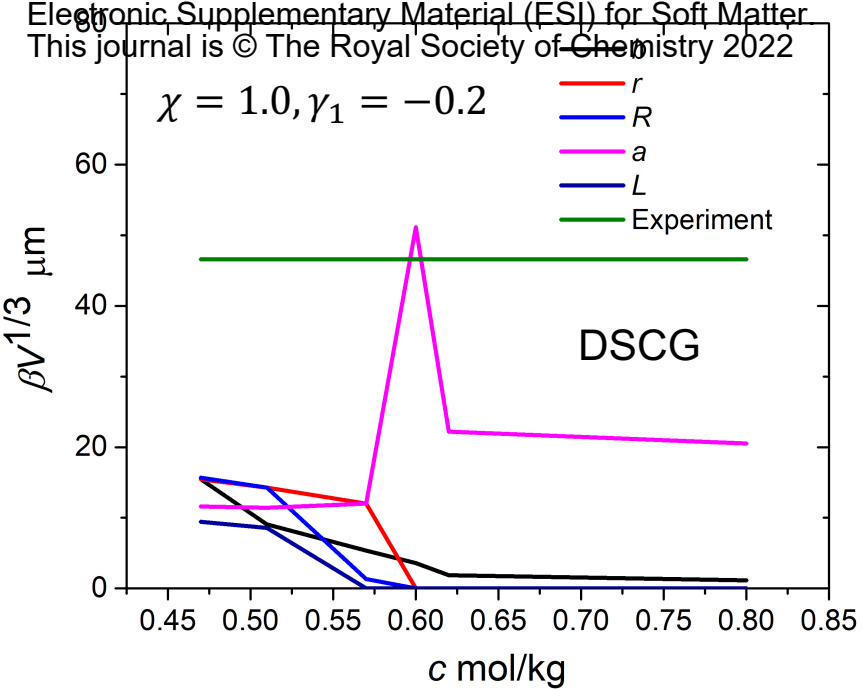

a

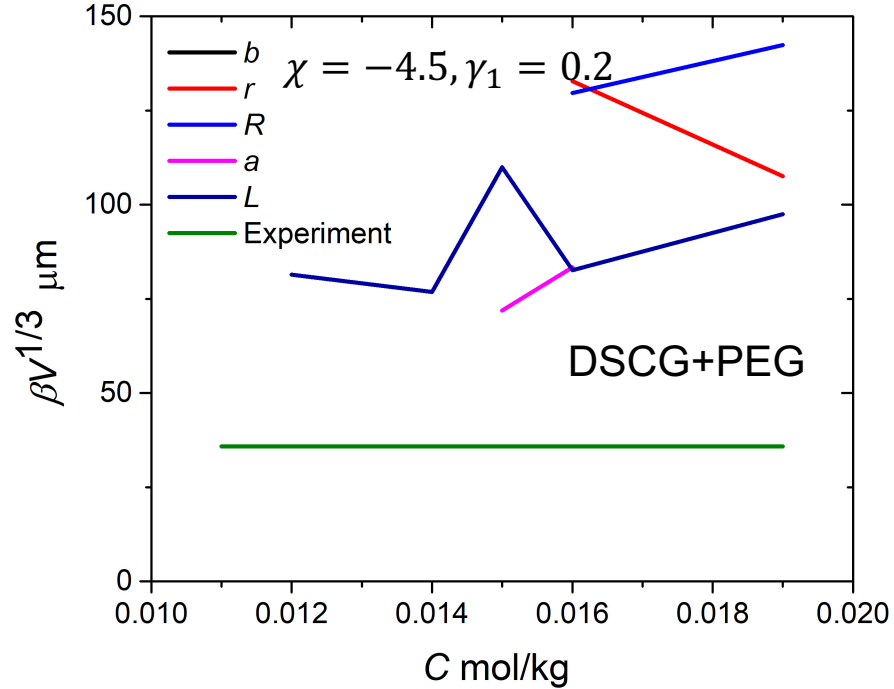

b

Supplement: d2sm00712f7.pdf [file d2sm00712f7.pdf]

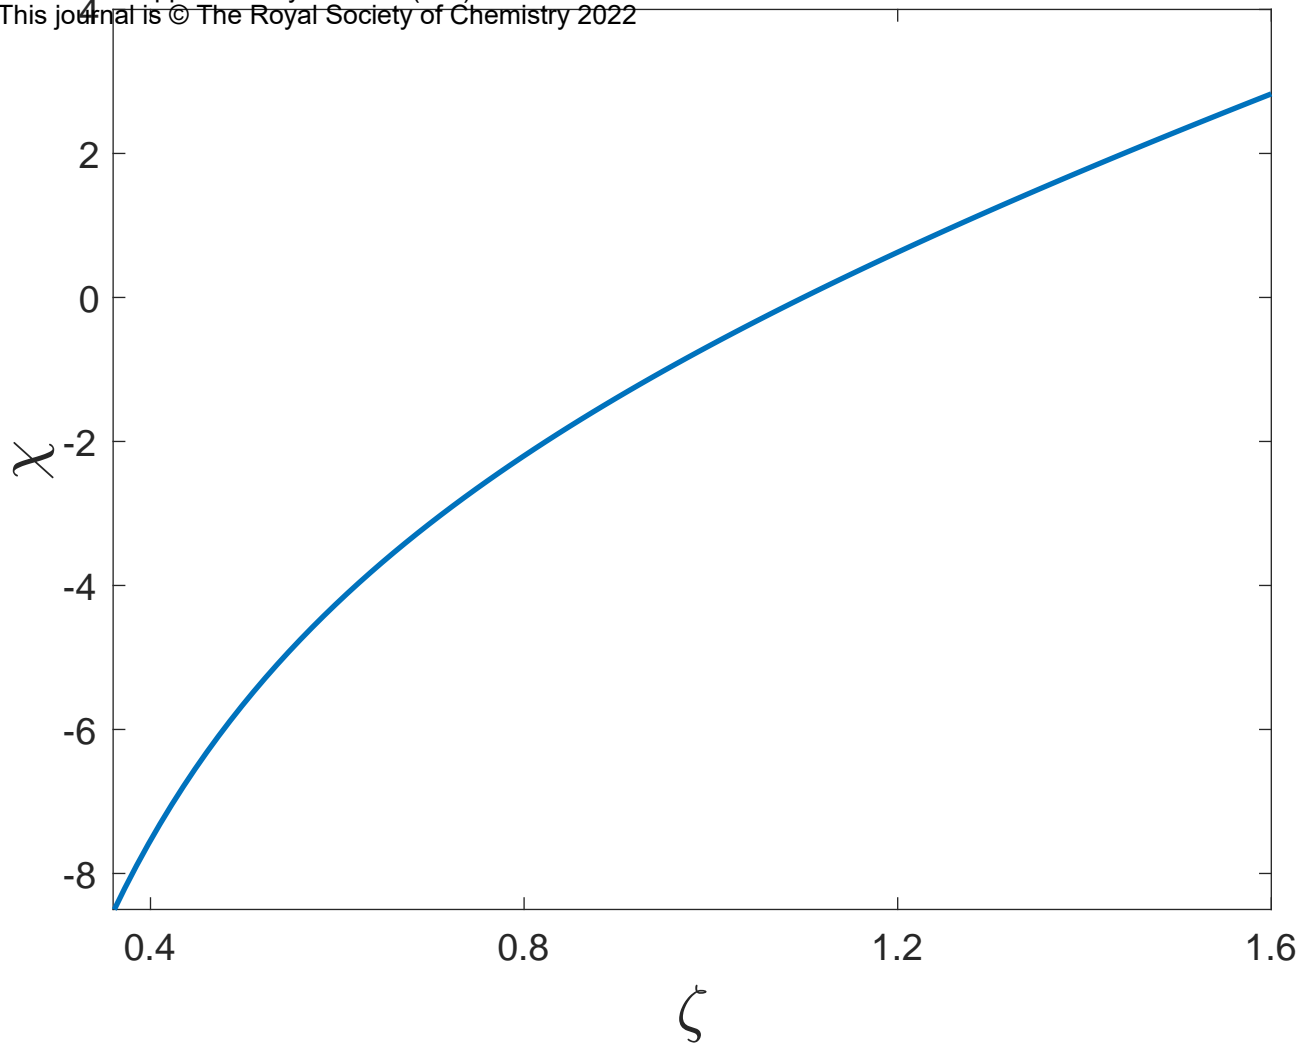

Supplement: d2sm00712f8.pdf [file d2sm00712f8.pdf]

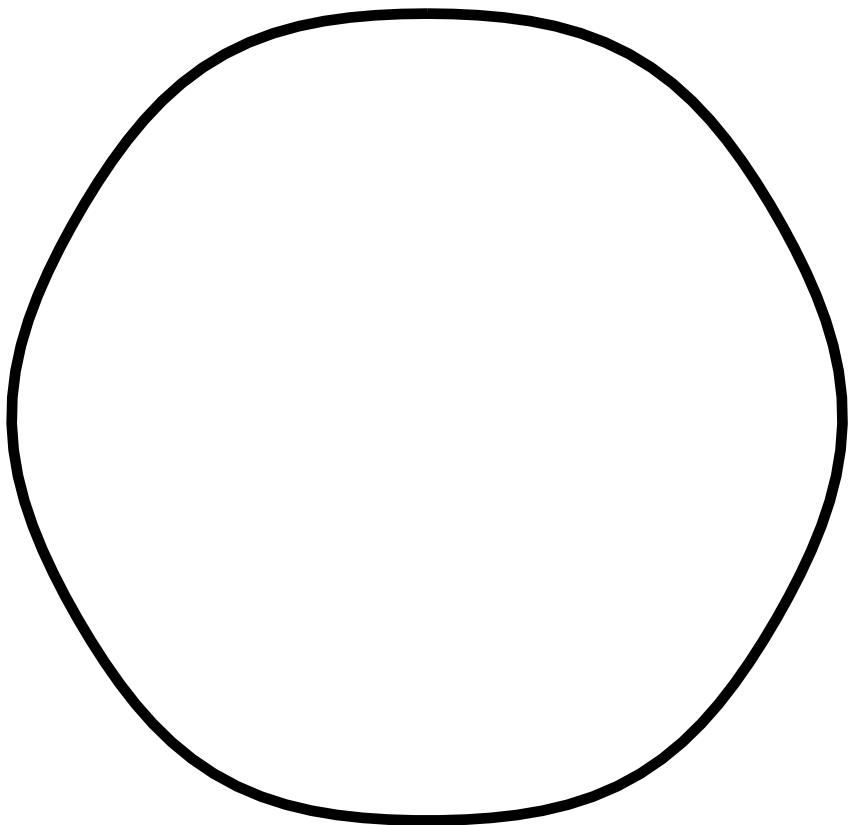

Supplement: d2sm00712f9.pdf [file d2sm00712f9.pdf]
